# Supplementary material for: A chiral porous 3D metal–organic framework with an unprecedented 4-connected network topology
Source: Royal Society of Chemistry journal article supplement (doi:10.1039/b505916j), 2005-01-01
Supplement: b505916j.pdf [file b505916j.pdf]

## Supplemental Information for

### A chiral porous 3D metal-organic framework with an unprecedented 4-connected network topology

Chuan-De Wu and Wenbin Lin\*

Department of Chemistry, CB#3290, University of North Carolina, Chapel Hill, NC 27599, USA;

Email: wlin@unc.edu

**Table S1.** Crystal data and structure refinement for [CdL<sub>2</sub>(H<sub>2</sub>O)<sub>2</sub>][ClO<sub>4</sub>]<sub>2</sub>·2DMF·3EtOH·5/3H<sub>2</sub>O (**1**)

|                                                  | <b>1</b>                                    |
|--------------------------------------------------|---------------------------------------------|
| Formula                                          | C80 H91.33 Cd Cl6 N6 O20.67                 |
| Formula weight                                   | 1792.69                                     |
| Crystal size (mm <sup>3</sup> )                  | 0.60 × 0.50 × 0.30                          |
| Crystal color                                    | colorless                                   |
| Crystal system                                   | trigonal,                                   |
| Space group                                      | P321                                        |
| Unit cell dimensions                             | a = 26.209(2) Å<br>c = 12.752(2) Å          |
| Volume (Å <sup>3</sup> )                         | 7586.1(13)                                  |
| Z                                                | 3                                           |
| Calculated density (g·cm <sup>-3</sup> )         | 1.177                                       |
| F(000)                                           | 2786                                        |
| Temperature (K)                                  | 173(2)                                      |
| Wavelength (Å)                                   | 0.71073                                     |
| Absorption coefficient (mm <sup>-1</sup> )       | 0.436                                       |
| θ for data collection (°)                        | 1.83 to 23.30                               |
| Limiting indices                                 | -27 ≤ h ≤ 28, -29 ≤ k ≤ 29, -14 ≤ l ≤ 14    |
| Reflections collected                            | 48883                                       |
| Unique reflections (R(int))                      | 7294 [R(int) = 0.0796]                      |
| Refinement method                                | Empirical                                   |
| Absorption correction                            | Full-matrix least-squares on F <sup>2</sup> |
| Data / restraints / parameters                   | 7294 / 12 / 481                             |
| Goodness-of-fit on F <sup>2</sup>                | 1.070                                       |
| Final R indices [I > 2σ(I)]                      | R1 = 0.0831, wR2 = 0.2268                   |
| R indices (all data)                             | R1 = 0.0986, wR2 = 0.2415                   |
| Flack parameter                                  | 0.04(5)                                     |
| Largest diff. peak and hole (e·Å <sup>-3</sup> ) | 0.907 and -0.894                            |

$$R1 = \sum(|F_o| - |F_c|) / \sum|F_o|, wR2 = [\sum w(F_o^2 - F_c^2)^2 / \sum w(F_o^2)]^{0.5}.$$

**Table S2.** Atomic coordinates ( $\times 10^4$ ) and equivalent isotropic displacement parameters ( $\text{\AA}^2 \times 10^3$ ) for **1**.

| Atom  | x        | y         | z         | U(eq)   | Atom   | x        | y         | z          | U(eq)   |
|-------|----------|-----------|-----------|---------|--------|----------|-----------|------------|---------|
| Cd(1) | 6989(1)  | 0         | -10000    | 37(1)   | C(21)  | 4989(5)  | 2102(5)   | -4307(8)   | 66(3)   |
| Cl(1) | 6778(1)  | 548(1)    | -3528(2)  | 59(1)   | C(22)  | 4696(5)  | 2269(5)   | -3608(7)   | 61(2)   |
| Cl(2) | 2870(2)  | -275(2)   | -1786(5)  | 177(3)  | C(23)  | 4239(5)  | 1865(5)   | -2989(8)   | 61(2)   |
| O(1)  | 4649(4)  | 1463(3)   | -6579(5)  | 68(2)   | C(24)  | 4061(5)  | 1249(4)   | -3080(8)   | 63(3)   |
| O(2)  | 5419(4)  | 2483(3)   | -4956(6)  | 85(3)   | C(25)  | 3592(6)  | 815(4)    | -2491(9)   | 77(4)   |
| O(3)  | 7458(4)  | -381(3)   | -11040(5) | 65(2)   | C(26)  | 3407(10) | 262(7)    | -2634(19)  | 151(9)  |
| O(4)  | 2874(9)  | 1929(8)   | 2826(16)  | 226(10) | C(27)  | 3724(7)  | 79(6)     | -3299(14)  | 131(7)  |
| O(5)  | 7950(20) | -890(20)  | -9870(30) | 213(15) | C(28)  | 4172(6)  | 480(6)    | -3830(14)  | 106(5)  |
| O(6)  | 8251(19) | -1214(18) | -7740(30) | 202(13) | C(29)  | 4359(4)  | 1088(4)   | -3810(8)   | 55(2)   |
| N(1)  | 6536(3)  | 363(3)    | -8830(5)  | 39(2)   | C(30)  | 3090(5)  | 2124(4)   | -1611(8)   | 61(3)   |
| N(2)  | 3430(4)  | 2562(4)   | -942(5)   | 51(2)   | C(31)  | 3341(5)  | 1882(4)   | -2302(8)   | 58(3)   |
| N(3)  | 3027(13) | 1351(16)  | 4088(17)  | 253(18) | C(32)  | 3946(5)  | 2075(5)   | -2253(7)   | 60(3)   |
| C(1)  | 6832(4)  | 810(4)    | -8209(6)  | 40(2)   | C(33)  | 4283(5)  | 2527(5)   | -1537(7)   | 61(3)   |
| C(2)  | 6598(4)  | 992(4)    | -7473(6)  | 46(2)   | C(34)  | 3997(4)  | 2735(4)   | -920(6)    | 48(2)   |
| C(3)  | 6000(3)  | 728(3)    | -7366(6)  | 36(2)   | C(35)  | 3470(20) | 1940(40)  | 4550(20)   | 400(50) |
| C(4)  | 5664(4)  | 252(4)    | -8005(6)  | 43(2)   | C(36)  | 2836(17) | 730(17)   | 4500(20)   | 229(14) |
| C(5)  | 5945(4)  | 70(4)     | -8721(5)  | 40(2)   | C(37)  | 2694(13) | 1411(14)  | 3180(20)   | 235(19) |
| C(6)  | 5713(4)  | 929(4)    | -6574(7)  | 43(2)   | C(38)  | 7160(20) | -1710(20) | -10260(40) | 186(19) |
| C(7)  | 5319(4)  | 1089(4)   | -6959(7)  | 48(2)   | C(39)  | 7710(20) | -1440(20) | -9770(40)  | 177(18) |
| C(8)  | 5038(4)  | 1290(4)   | -6263(7)  | 47(2)   | C(40)  | 8140(20) | -870(30)  | -6580(40)  | 180(20) |
| C(9)  | 5160(4)  | 1329(4)   | -5167(6)  | 43(2)   | C(41)  | 8150(20) | -1310(20) | -6870(40)  | 163(16) |
| C(10) | 5561(4)  | 1170(4)   | -4793(6)  | 45(2)   | C(43)  | 5380(60) | -4030(60) | 690(100)   | 290(70) |
| C(11) | 5714(5)  | 1213(4)   | -3683(6)  | 51(2)   | Cl(3)  | 3932(9)  | -4419(9)  | 107(14)    | 201(12) |
| C(12) | 6089(4)  | 1041(4)   | -3313(6)  | 45(2)   | O(9)   | 4025(11) | -4854(10) | 398(19)    | 194(12) |
| C(13) | 6310(4)  | 788(4)    | -4007(6)  | 47(2)   | O(10)  | 4411(11) | -4014(12) | -510(20)   | 156(17) |
| C(14) | 6209(4)  | 754(4)    | -5096(6)  | 40(2)   | O(11)  | 3445(10) | -4612(12) | -510(20)   | 239(13) |
| C(15) | 5833(3)  | 953(3)    | -5485(6)  | 36(2)   | O(12)  | 3880(20) | -4124(18) | 940(20)    | 198(5)  |
| C(16) | 4639(6)  | 1558(5)   | -7688(9)  | 73(3)   | O(102) | 5670(50) | -2860(50) | -420(80)   | 140(50) |
| C(17) | 4278(7)  | 1871(7)   | -7845(13) | 107(5)  | C(42)  | 5540(30) | -4460(30) | 0          | 230(30) |
| C(18) | 5760(6)  | 3244(6)   | -6199(11) | 93(4)   | O(8)   | 5410(40) | -3770(50) | 310(80)    | 180(50) |
| C(19) | 5396(7)  | 2992(5)   | -5322(12) | 91(4)   | O(101) | 3333     | -3333     | 2340(20)   | 167(9)  |
| C(20) | 4828(5)  | 1518(4)   | -4432(7)  | 54(2)   |        |          |           |            |         |

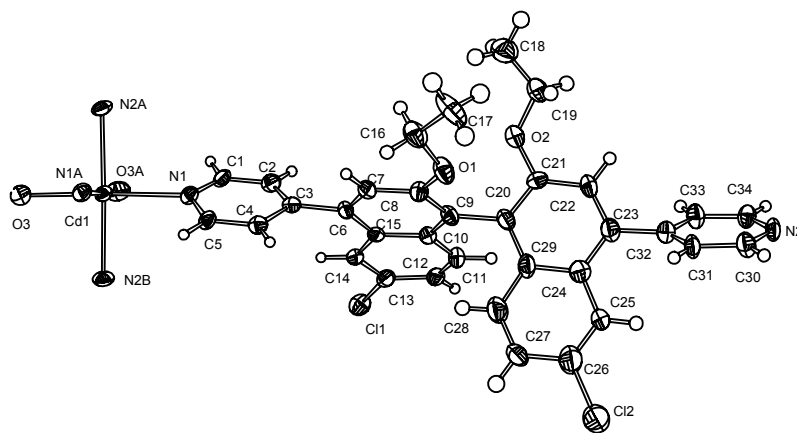

**Figure S1.** ORTEP representation of the symmetry expanded local structure for **1** (30% probability ellipsoids).

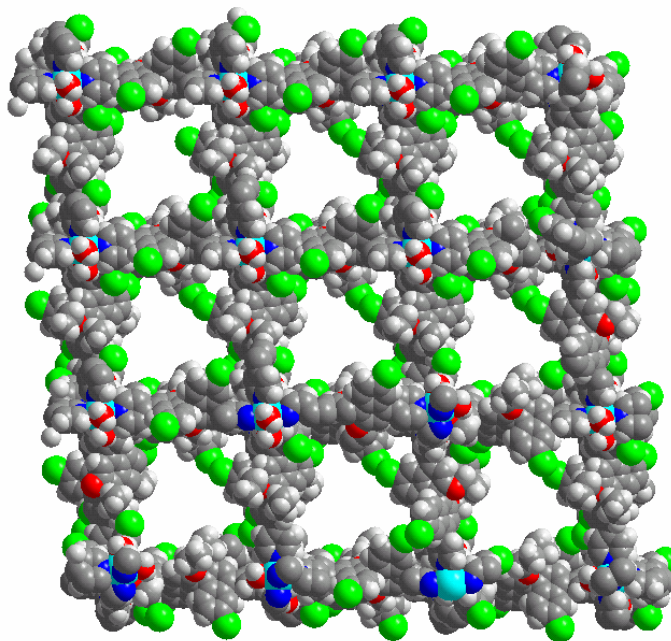

**Figure S2.** Packing diagram of **1**, showing the square cavities with dimensions of  $20.4 \times 20.4 \text{ \AA}^2$ .

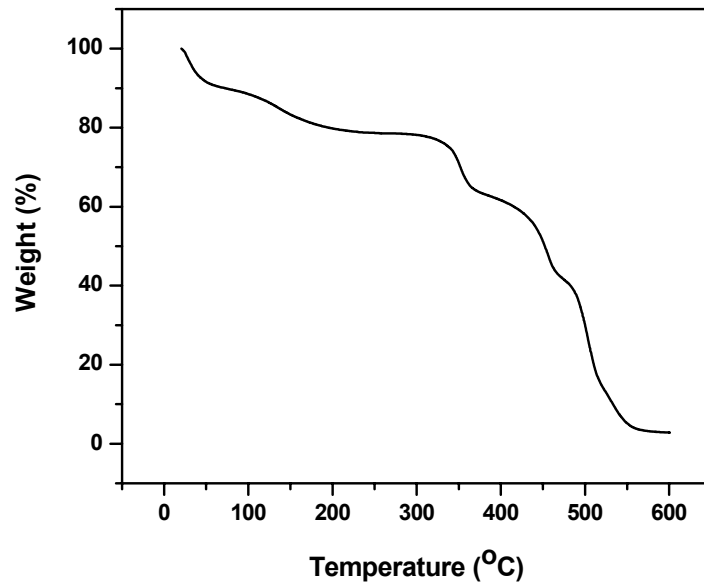

**Figure S3.** Thermogravimetric analyses (TGA) for **1** between 20 and 600 °C

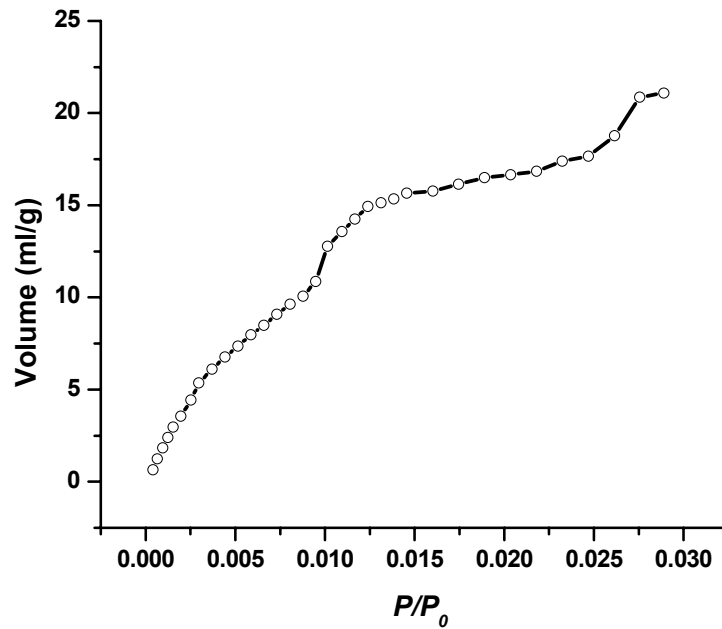

**Figure S4.** CO<sub>2</sub> adsorption isotherm for an evacuated sample of **1** at 273 K.

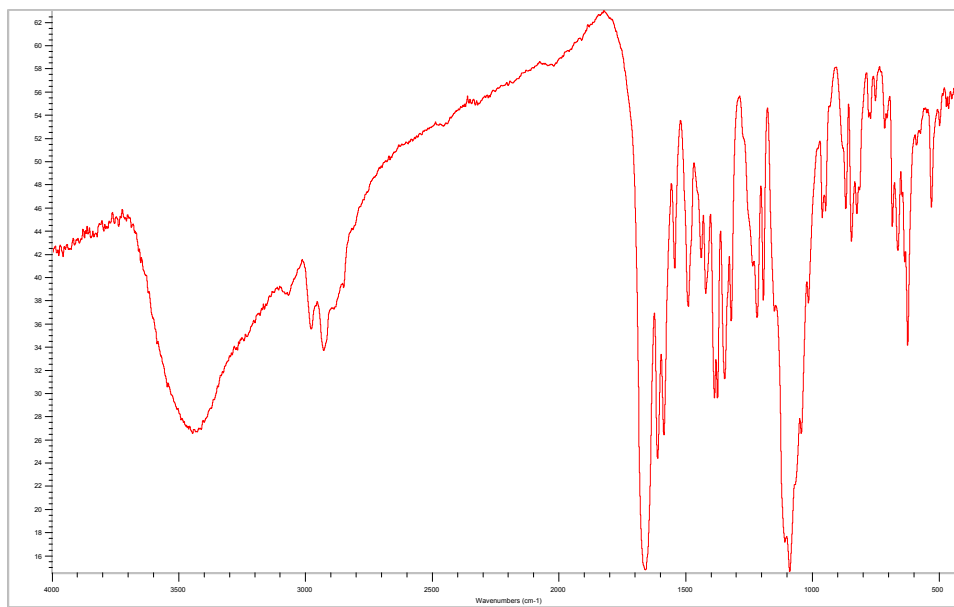

**Figure S5.** IR spectrum of **1**.

**Enantioselective sorption of racemic 1-phenylethanol.** Compound **1** (0.025 g, 0.014 mmol) was evacuated at 75 °C for 12 hours under vacuum, and then 1 mL of racemic 1-phenylethanol was added. The mixture was stirred for 12 hours and filtered. The solid was washed with EtOH several times. The remaining solid was soaked in CH<sub>2</sub>Cl<sub>2</sub> and stirred overnight to exchange the 1-phenylethanol molecule guests from the porous solid. After filtration, the CH<sub>2</sub>Cl<sub>2</sub> solvent was removed under reduced pressure. The ee% of the adsorbed 1-phenylethanol was determined by GC on a Supelco β-Dex 120 column.
